# Supplementary material for: Predictors of Suicide Attempt Within 30 Days After First Medically Documented Suicidal Ideation in U.S. Army Soldiers
Source: Atypon-hosted journal article supplement (doi:10.1176/appi.ajp.2021.20111570), 2021-09-01
Supplement: appi.ajp.2021.20111570.ds001.pdf [file appi.ajp.2021.20111570.ds001.pdf]

## Study Measures

**Suicide ideation and suicide attempt.** Soldiers' first medically documented episode of suicidal ideation was identified, and among this group, those with a suicide attempt within 30 days of the suicidal ideation were identified. Soldiers who attempted suicide within 30 days of their suicidal ideation diagnosis were labeled as 'cases' and those who did not were 'controls.' Classification was accomplished using administrative records from: the DoDSER (Gahm et al., 2012), a DoD-wide surveillance mechanism that aggregates suicidal behavior information via a standardized form completed by medical providers at DoD treatment facilities; and the ICD-9-CM V62.84 code (indicating SI) and E950-E958 codes (indicating self-inflicted poisoning or injury with suicidal intent) from the Military Health System Data Repository (MDR), Theater Medical Data Store (TMDS), and TRANSCOM (Transportation Command) Regulating and Command and Control Evacuating System (TRAC<sup>2</sup>ES), which together provide healthcare encounter information from military and civilian treatment facilities, combat operations, and aeromedical evacuations (Table S1, available online at [www.starrs-ls.org/#/list/publications](http://www.starrs-ls.org/#/list/publications)). The E959 code (late effects of a self-inflicted injury) was excluded, as it confounds the temporal relationships between the predictor variables and suicide attempt (Walkup et al., 2012). Records from different data systems were cross-referenced to ensure all cases represent unique soldiers.

**Socio-demographic and service-related characteristics.** Army and DoD administrative personnel records were used to construct socio-demographic (gender, current age, race/ethnicity, education, marital status) and service-related variables (age at Army entry, time in service,

deployment status [never, currently, previously], demotion, delayed promotion, and military occupation [combat arms (which includes combat arms and special forces), combat medic, other; Table S1].

**Mental health diagnosis.** Administrative medical records identified 28 categories of documented mental disorder diagnoses defined by aggregated ICD-9-CM codes (e.g., attention-deficit/hyperactivity learning disorders [ICD-9-CM codes 314.0-315.9]) and V codes for stressors/adversities (V40.0-V40.9, V61-V61.9, V62-V62.90) and marital problems (V61.1-V61.12) (Table S2). Each mental disorder was categorized into two separate time periods, identified by those disorders occurring on the same day as the first suicidal ideation diagnosis and those identified as occurring prior to the day of first suicidal ideation diagnosis. The indicator variables included each of the ICD-9-CM mental disorder diagnostic codes and stressors/adversities and marital problems V codes. This definition of mental disorder diagnosis detected all soldiers with and without documented, clinically significant, mental health difficulties. In most cases, absence of mental disorder diagnosis indicates significant symptoms were not reported or detected during routine medical care.

**Physical healthcare visits and injuries.** Administrative medical records identified number of days with a recent outpatient physical healthcare visit (defined as in the previous two months; Ursano, Kessler, Naifeh, et al., 2018), presence and recency of outpatient and inpatient visits for previous injury, and combat injury-related visits. Injury-related healthcare visits were identified using ICD-9-CM codes 800-999, 700s codes indicating musculoskeletal injuries (Hauret et al., 2010), supplemental E-codes, and injury and trauma codes from NATO Standardization Agreement 2050 (Amoroso et al., 2000).

**Family violence and crime.** Family violence variables were constructed to examine documented family violence victimization or perpetration history (e.g., physical, sexual, or emotional abuse of spouse or child) using legal records, the Army Central Registry (a Family Services data system capturing family violence-related events), and medical (ICD-9-CM) records (Tables S3, S4; details reported elsewhere; Ursano, Stein, Herberman Mash, et al., 2018). Consistent with previous work (Ursano, Stein, Herberman Mash, et al., 2018), the family violence indicator included founded or unfounded legal events and substantiated or unsubstantiated Army Central Registry events. We also constructed variables for: any history of family violence; number of family violence events; time since the most recent family violence event (i.e., number of months, not including month of suicide attempt or sampled control person-month); and role in family violence events (perpetrator, victim only). We created variables that indicated crime perpetration or victimization separately by examining legal records for which the Army found sufficient evidence to warrant investigation (Table S5). These variables were categorized using a hierarchy of no legal incidents, non-violent legal incidents, violent minor legal incidents, and violent major incidents.

**TABLE S1. List and Brief Descriptions of Administrative Data Systems Included in the 2004-2009 Army STARRS Historical Administrative Data Study (HADS).**

| Database Acronym                               | Description                                                                                                                                                                                                                                                                                                                                                                                                                                                                                                                                                                                                                                                                                                                                                                                                                                                                                                                                           |
|------------------------------------------------|-------------------------------------------------------------------------------------------------------------------------------------------------------------------------------------------------------------------------------------------------------------------------------------------------------------------------------------------------------------------------------------------------------------------------------------------------------------------------------------------------------------------------------------------------------------------------------------------------------------------------------------------------------------------------------------------------------------------------------------------------------------------------------------------------------------------------------------------------------------------------------------------------------------------------------------------------------|
| AFMETS                                         | ARMED FORCES MEDICAL EXAMINER TRACKING SYSTEM (AFMETS): Variables include manner of death and cause of death, including self-inflicted.                                                                                                                                                                                                                                                                                                                                                                                                                                                                                                                                                                                                                                                                                                                                                                                                               |
| DCIPS                                          | DEFENSE CASUALTY INFORMATION PROCESSING SYSTEM (DCIPS): Casualty data system for Army, Navy, Air Force, and Marines. It contains information on all casualties including deceased active duty members (and cause of death).                                                                                                                                                                                                                                                                                                                                                                                                                                                                                                                                                                                                                                                                                                                           |
| DMDC/CTS                                       | DEFENSE MANPOWER DATA CENTER (DMDC) / CONTINGENCY TRACKING SYSTEM (CTS): Collection of activation, mobilization, and deployment data. Provides information to DoD decision makers and includes a CTS Deployment File used for tracking the location of deployed personnel.                                                                                                                                                                                                                                                                                                                                                                                                                                                                                                                                                                                                                                                                            |
| DMDC/Master Personnel & DMDC/Transaction files | DEFENSE MANPOWER DATA CENTER (DMDC) / MASTER PERSONNEL & TRANSACTION FILES: The Active Duty Master File provides an inventory of all individuals on active duty (excluding reservists on active duty for training) at a point in time. It is a standardized and centralized database of present and past members of the active duty force. Personal data elements include social security number, education level, home of record, date of birth, marital status, number of dependents, race, ethnic group, and name. Military data elements include Service, pay grade, Armed Forces Qualification Test percentile (enlisted only), source of commission (officers only), military primary duty and secondary occupation, Unit Identification Code, months of service, duty location, Estimated Termination of Service date, basic active service date, date of current rank, pay entry base date, foreign language ability, and major command code. |
| DODSER                                         | DEPARTMENT OF DEFENSE SUICIDE EVENT REPORT (DODSER): Provides risk and protective factor information for suicide events. This file contains non-fatal attempts, completed suicides, and suicide ideation cases.                                                                                                                                                                                                                                                                                                                                                                                                                                                                                                                                                                                                                                                                                                                                       |
| MDR                                            | MILITARY HEALTH SYSTEM DATA REPOSITORY (MDR): This database contains information about medical, dental, pharmaceutical, and ancillary claims data for both in network and purchased care as well as both inpatient and outpatient treatment. Data are collected on both Army personnel and their beneficiaries.                                                                                                                                                                                                                                                                                                                                                                                                                                                                                                                                                                                                                                       |
| DMDC/DEERS                                     | DEFENSE MANPOWER DATA CENTER (DMDC) / DEFENSE ENROLLMENT ELIGIBILITY REPORTING SYSTEM (DEERS): A DoD PDR containing personnel data and data related to DoD affiliation, benefits, employment, and pay.                                                                                                                                                                                                                                                                                                                                                                                                                                                                                                                                                                                                                                                                                                                                                |

|         |                                                                                                                                                                                                                                                                                                                                                                                                                                                 |
|---------|-------------------------------------------------------------------------------------------------------------------------------------------------------------------------------------------------------------------------------------------------------------------------------------------------------------------------------------------------------------------------------------------------------------------------------------------------|
| TMDS    | THEATER MEDICAL DATA STORE (TMDS): Used to track, analyze, view and manage Soldier medical treatment information recorded in the theater of operations. Features of TMDS: accessibility and visibility of service members' deployed medical records, outpatient and inpatient treatment records created in theater facilities, treatment records from other applications, reports on movement of patients, patient status and injury/illnesses. |
| TRAC2ES | TRANSCOM REGULATING AND COMMAND AND CONTROL EVACUATION SYSTEM (TRAC2ES): A tracking system for all medical transfers across the world for all DOD services.                                                                                                                                                                                                                                                                                     |

---

**TABLE S2. List of Military Occupational Specialties (MOS) in the 2004-2009 Army STARRS Historical Administrative Data Study (HADS) that were Categorized at Combat Arms, Special Forces, and Combat Medic**

---

**Combat Arms**

|      |                                  |
|------|----------------------------------|
| E11B | Infantryman                      |
| E11C | Indirect Fire Infantryman        |
| E11Z | Infantry Senior Sergeant         |
| E13B | Cannon Crewmember                |
| E13E | Cannon Fire Direction Specialist |
| E13F | Fire Support Specialist          |
| E13S | Field Artillery Surveyor         |
| E19D | Cavalry Scout                    |
| E19K | M1 Armor Crewman                 |
| E19Z | Armor Senior Sergeant            |

**Special Forces**

|      |                                                               |
|------|---------------------------------------------------------------|
| E00D | Special Duty Assignment                                       |
| E18B | Special Forces Weapons Sergeant                               |
| E18C | Special Forces Engineer Sergeant                              |
| E18E | Special Forces Communications Sergeant                        |
| E18F | Special Forces Assistant Operations and Intelligence Sergeant |
| E18Z | Special Forces Senior Sergeant                                |

**Combat Medic**

|      |                        |
|------|------------------------|
| E68W | Health Care Specialist |
| E91W | Health Care Specialist |

---

**TABLE S3. International Classification of Diseases, Ninth Revision–Clinical Modification (ICD-9-CM) Codes Used to Identify Mental Disorders.**

| Included Mental Health Diagnoses                    | ICD-9-CM Codes                                                                                                                                                                                                    |
|-----------------------------------------------------|-------------------------------------------------------------------------------------------------------------------------------------------------------------------------------------------------------------------|
| Adjustment Disorder                                 | 309, .29, .3, .4, .82, .83, .89, .9                                                                                                                                                                               |
| Dysthymic Disorder/ Neurasthenia/<br>Depression NOS | 296.82, .90, .99<br><br>300.4, .5<br><br>309.0, .1<br><br>311, .0, .1<br><br>313.1                                                                                                                                |
| Major Depression                                    | 296.2, .20, .21, .22, .23, .24, .25, .26, .3, .30, .31, .32, .33, .34, .35, .36                                                                                                                                   |
| Bipolar Disorder                                    | 296.00, .01, .02, .03, .04, .05, .06, .10, .11, .12, .13, .14, .15, .16, .40, .41, .42, .43, .44, .45, .46, .50, .51, .52, .53, .54, .55, .56, .60, .61, .62, .63, .64, .65, .66, .7, .80, .81, .89<br><br>301.13 |
| Anxiety State/ Anxiety Disorder                     | 300, .00, .01, .02, .09, .20, .21, .22, .23, .29, .3<br><br>309.21, .24, .28<br><br>313.0, .21, .22, .23                                                                                                          |

|                                                                     |                                                                                                                                                                                                   |
|---------------------------------------------------------------------|---------------------------------------------------------------------------------------------------------------------------------------------------------------------------------------------------|
| Post-Traumatic Stress Disorder                                      | 309.81                                                                                                                                                                                            |
| Attention-Deficit/Hyperactivity Disorder/ Learning Disorders        | 314.0, .00, .01, .1, .2, .8, .9<br>315.00, .01, .02, .09, .1, .2, .3, .31, .32, .34, .39, .4, .5, .8, .9                                                                                          |
| Conduct Disorder/ Oppositional Defiant Disorder                     | 301.7<br>312.4, .8, .81, .82, .89, .9<br>313.81<br>V62.83                                                                                                                                         |
| Eating Disorders                                                    | 307.1, .50, .51, .59                                                                                                                                                                              |
| Other Impulse Control Disorders                                     | 312.00, .01, .02, .03, .10, .11, .12, .13, .20, .21, .22, .23, .3, .30, .31, .32, .33, .34, .35, .39                                                                                              |
| Alcohol Induced Mental Disorders/ Alcohol Dependence/ Alcohol Abuse | 291.0, .1, .2, .3, .4, .5, .8, .81, .82, .89, .9<br>303.00, .01, .02, .03, .9, .90, .91, .92, .93<br>305, .0, .00, .01, .02, .03                                                                  |
| Drug Induced Mental Disorders                                       | 292                                                                                                                                                                                               |
| Non-Dependent Drug Abuse                                            | 305.2, .20, .21, .22, .23, .3, .30, .31, .32, .33, .4, .40, .41, .42, .43, .5, .50, .51, .52, .53, .6, .60, .61, .62, .63, .7, .70, .71, .72, .73, .8, .80, .81, .82, .83, .9, .90, .91, .92, .93 |



|                                    |                                                                                                                                                                                                                                                                                                          |
|------------------------------------|----------------------------------------------------------------------------------------------------------------------------------------------------------------------------------------------------------------------------------------------------------------------------------------------------------|
| Drug dependence                    | 304                                                                                                                                                                                                                                                                                                      |
| Personality Disorders              | 301.0, .1, .10, .11, .12, .20, .21, .22, .3, .4, .50, .51, .59, .6, .8, .80, .81, .82, .83, .84, .89, .9                                                                                                                                                                                                 |
| Non-Affective Psychosis            | 295.00, .01, .02, .03, .04, .05, .10, .11, .12, .13, .14, .15, .20, .21, .22, .23, .24, .25, .30, .31, .32, .33, .34, .35, .40, .41, .42, .43, .44, .45, .50, .51, .52, .53, .54, .60, .61, .62, .63, .64, .65, .70, .71, .72, .73, .74, .75, .80, .81, .82, .83, .84, .85, .90, .91, .92, .93, .94, .95 |
|                                    | 297.0, .1, .2, .3, .8, .9                                                                                                                                                                                                                                                                                |
|                                    | 298.0, .1, .2, .3, .4, .8, .9, .90                                                                                                                                                                                                                                                                       |
| Somatoform/ Dissociative Disorders | 300.10, .11, .12, .13, .14, .15, .16, .19, .6, .7, .80, .81, .82, .89                                                                                                                                                                                                                                    |
|                                    | 306.0, .1, .2, .3, .4, .50, .51, .52, .53, .59, .6, .7, .8, .9                                                                                                                                                                                                                                           |
|                                    | 307.54, .80, .81, .89                                                                                                                                                                                                                                                                                    |
| Organic Mental Disorders           | 290.0, .10, .11, .12, .13, .20, .21, .3, .40, .41, .42, .43, .8, .9                                                                                                                                                                                                                                      |
|                                    | 293.0, .1, .81, .82, .83, .84, .89, .89, .9                                                                                                                                                                                                                                                              |
|                                    | 294.0, .1, .10, .11, .8, .9                                                                                                                                                                                                                                                                              |
|                                    | 307.20, .21, .22, .23, .3                                                                                                                                                                                                                                                                                |
|                                    | 310.0, .8, .9                                                                                                                                                                                                                                                                                            |
|                                    | 317                                                                                                                                                                                                                                                                                                      |

|                                        |                                                                                                                           |
|----------------------------------------|---------------------------------------------------------------------------------------------------------------------------|
|                                        | 318.0, .1, 2                                                                                                              |
|                                        | 319                                                                                                                       |
| Sexual Disorders                       | 302, .0, .1, .2, .3, .4, .50, .51, .52, .53, .6, .70, .71, .72, .73, .74, .75, .76, .79, .81, .82, .83, .84, .85, .89, .9 |
| Sleep Disorders                        | 307.4, .40, .41, .42, .43, .44, .45, .46, .47, .48, .49                                                                   |
| Other Mental Disorders/ Mental Illness | 292.85                                                                                                                    |
|                                        | 299.00, .01, .10, .80, .81, .90, .91                                                                                      |
|                                        | 300.9                                                                                                                     |
|                                        | 307.0, .52, .53, .6, .7, .9                                                                                               |
|                                        | 309.22                                                                                                                    |
|                                        | 310.1                                                                                                                     |
|                                        | 313.3, .82, .89, .9                                                                                                       |
|                                        | 316                                                                                                                       |
| Traumatic Stress                       | 308, .0, .1, .2, .3, .4, .9                                                                                               |
| Stressors/ Adversities                 | V40.0, .00, .1, .2, .20, .3, .30, .9, .90                                                                                 |
|                                        | V61, .0, .01, .02, .03, .04, .05, .06, .07, .08, .09, .2, .20, .21, .22, .23, .24, .29, .3, .4, .41, .42, .49, .8, .9     |

V62, .0, .1, .10, .2, .20, .21, .22, .29, .3, .4, .5, .8, 80, .81, .810, .811, .812, .82, .89, .9, .90

V69.4, .5, .9

|                                             |                           |
|---------------------------------------------|---------------------------|
| Marital Problems                            | V61.1, .10, .11, .12      |
| Postconcussion Syndrome                     | 310.2                     |
| Tobacco Use Disorder                        | 301.1, .10, .11, .12, .13 |
| Indicator of Impulsivity and Risky Behavior | V69.2, .3                 |
| Self-Damaging Behavior                      | V69.8                     |

---

**Excluded Mental Health Diagnoses ICD-9-CM Codes**

---

Symptoms, Signs, and Ill-Defined Conditions, Mental

797

798, .0, .1, .2, .9

799, .0, .01, .02, .1, .2, .21, .22, .23, .24, .25, .29, .3, .4, .8, .81, .82, .89, .9

Prior History of Mental Disorders

V11.0, .1, .2, .3, .8, .80, .9, .90

V66.3

V67.3

---

**TABLE S4. List of Family Violence-Related Categories Included in the 2004-2009 Army STARRS Historical Administrative Data Study (HADS).**

| Data Sources                                      | Database / Code    | Description                                                                                                                                                                                                                                                                                                                                                                                                                                                                  |
|---------------------------------------------------|--------------------|------------------------------------------------------------------------------------------------------------------------------------------------------------------------------------------------------------------------------------------------------------------------------------------------------------------------------------------------------------------------------------------------------------------------------------------------------------------------------|
| <b>Army Legal Records</b>                         |                    | Include legal records of aggravated and/or simple assault, emotional and/or sexual abuse, and family-related non-violent offenses                                                                                                                                                                                                                                                                                                                                            |
|                                                   | ACMIS              | Army Court Martial Management Information Systems (ACMIS). System provides for the efficient collection, manipulation and presentation of data associated with Army courts martial. System includes data on docket entries; the accused; alleged offenses; trials and decisions; and sentences.                                                                                                                                                                              |
|                                                   | CIMS / ACI2        | Criminal Investigation Division Information Management System (CIMS) / Automated Criminal Investigation/Criminal Intelligence (ACI2). Event-level crime record database. Separate system from ASCRC.                                                                                                                                                                                                                                                                         |
|                                                   | CIMS / ASCRC (OIF) | Criminal Investigation Division Information Management System (CIMS) / Automated System Crime Record Center (ASRC). Receives, maintains, accounts for, disseminates information from, and disposes of Army crime records; retrieves and correlates data and statistics from the records and provides to authorized recipients; coordinates automation of crime records data and information; and serves as functional proponent for the electronic imaging of crime records. |
|                                                   | COPS / MPRS        | Centralized Operations Police Suite (COPS) / Military Police Reporting System (MPRS). Centralized database that contains subsystems supporting the Military Police Corps Army-wide. Contains information included in law enforcement reports.                                                                                                                                                                                                                                |
|                                                   | SADMS              | Sexual Assault Data Management System (SADMS). Centralized repository of relevant data regarding the entire lifecycle of sexual assault cases, involving victims and/or alleged offenders.                                                                                                                                                                                                                                                                                   |
| <b>Army Central Registry (ACR; Substantiated)</b> |                    | This is a victim-based registry documenting spouse and child abuse events involving Army service members. Substantiated incidents or evidence of an incident in the ACR include                                                                                                                                                                                                                                                                                              |

---

physical, sexual, emotional, and neglect subtypes.

---

**ICD-9 Codes**

|        |                                                           |
|--------|-----------------------------------------------------------|
| 995.80 | Unspecified Adult Maltreatment                            |
| 995.81 | Adult Physical Abuse                                      |
| 995.82 | Adult Emotional / Psychological Abuse                     |
| 995.83 | Adult Sexual Abuse                                        |
| 995.84 | Adult Neglect (Nutritional)                               |
| 995.85 | Other Adult Abuse and Neglect                             |
| E967.3 | Perpetrator of Adult and Child Abuse by Spouse or Partner |
| V61.11 | Counseling for Victim of Spouse and Partner Abuse         |
| V61.12 | Counseling for Perpetrator of Spousal and Partner Abuse   |
| V61.22 | Counseling for Perpetrator of Parent Child Abuse          |
| V62.83 | Counseling for Perpetrator of Physical/Sexual Abuse       |

---

**TABLE S5. The National Corrections Reporting Program (NCRP) offense codes used to identify categories of family-related violence.**

I. Major Physical Violence

E.) Family-Related Aggravated Assault

64.2 Family-related aggravated assault

580 Cruelty to Spouse

120 Domestic Violence (other than verbal)

19. Child Abuse

170 Child Abuse, except offenses specified sexual in nature

170 Cruelty to Juvenile

171 Child Abuse, Attempted

172 Child Abuse, Conspiracy

Aggravated Abandonment

Child Neglect involving cruelty OR first and second degree

Assault on a child under the age of 16

Abuse of grandchildren

II. Minor Physical Violence

B.) Family-Related Simple Assault

89.1 Family-related simple assault

Spouse/family/domestic assault, unspecified degree

Domestic dispute, unspecified (different from domestic disturbance)

III. Verbal Violence

D.) Family-Related Emotional Abuse

89.2 Family-related emotional abuse

Emotional abuse, of spouse/child/family member

IV. Sexual Violence

B.) Family-Related Sexual Violence

89.3 Family-related sexual offenses

Incest with a child (age < 18 years)

Rape of family member/spouse

Sexual abuse of family member/spouse

## V. Non-violent Offenses

### O.) Family-Related Non-Violence Offenses

- 58. Family-related offenses- Contempt of court
  - 530 Violation of protective order (family-related)
  - 530 Violation of restraining order (family-related)
- 64.1 Family-related offenses- Reckless endangerment
  - 580 Abandonment (except when specified Aggravated Abandonment)
  - 580 Desertion
  - Endangerment/mistreatment of dependent adult
  - 580 Failure to provide
  - 580 Non-support, family-related offenses
  - 580 Non-support of spouse or children
  - 9999 Endangerment/mistreatment of spouse
  - Spouse neglect
  - 180 Child endangerment
  - Child neglect
- 64.3 Family-related offenses- Domestic disturbance
  - Domestic/family disturbance (verbal or unspecified)
  - "Domestic," unspecified
- 64.4 Family-related offenses- Custody offenses
  - 580 Custodial interference
  - 580 Interference with custody
- 66.2 Family-related offenses- Morals/Decency- Other Moral/Decency offense
  - 600 Adultery
  - 600 Bigamy
  - 600 Incest (with person 18 years of age or older, or unspecified age)
  - 060 Sex with close blood relative (incest- no force)

**TABLE S6. The National Corrections Reporting Program (NCRP) offense codes used to identify categories of criminal perpetration and victimization**

**I. Minor Physical Violent Crime (Minor Violence)**

**A. Simple Assault**

- 15. Simple Assault
- 16.2 Simple Assault On A Public Officer
- 86. Simple Assault Of Military Official
- 20.2 Violent Offenses, Other – Simple Assault

**B. Family-Related Simple Assault**

- 89.1 Family-Related Simple Assault

**C. Other Physical Violence**

- 20.5 Violent Offenses, Other – Violent Offenses

**II. Verbal Violent Crime (Minor Violence)**

**A. Blackmail/Extortion/Intimidation**

- 17. Blackmail/Extortion/Intimidation

**B. Rioting**

- 56. Rioting

**C. Harassment (Non-Sexual)**

- 69.2 Invasion Of Privacy – Other Harassment
- 73.1 Other Public Order Offenses – Harassment

**E. Sexual Verbal Violence**

- 66.1 Morals/Decency – Sexual Harassment
- 69.1 Invasion Of Privacy – Sexual Harassment

**III. Major Physical Violent Crime (Major Violence)**

**A. Murder/Homicide/Manslaughter**

- 1. Murder
- 2. Unspecified Homicide
- 3. Voluntary/Nonnegligent Manslaughter
- 5. Manslaughter – Non-Vehicular

**B. Kidnapping**

- 6. Kidnapping

**C. Aggravated Arson**

- 22.1 Aggravated Arson

**D. Aggravated Assault**

- 14. Aggravated Assault
- 16.1 Aggravated Assault On A Public Officer
- 87. Aggravated Assault Of Military Official
- 20.1 Violent Offenses, Other – Aggravated Assault

**E. Family-Related Aggravated Assault**

- 64.2 Family Related Aggravated Assault
- 19. Child Abuse

**F. Robbery**



- 11. Armed Robbery
- 12. Unarmed Robbery

#### **IV. Sexual Violent Crime (Major Violence)**

##### **A. Rape/Sodomy/Sexual Assault**

- 7. Rape – Force
- 8. Rape – Statutory – No Force
- 13. Forcible Sodomy
- 9. Sexual Assault - Other
- 10. Lewd Act With Children

##### **B. Family-Related Sexual Violence**

- 89.3 Family-Related Sexual Offenses

#### **V. Non-Violent Offenses**

##### **A. Reckless Endangerment**

- 4. Manslaughter - Vehicular
- 18. Hit And Run Driving
- 32. Hit/Run Driving - Property Damage
- 61. Driving While Intoxicated
- 62. Driving Under The Influence (Dui)
- 63. Driving Under Influence (Dui) - Drugs
- 20.3 Violent Offenses, Other – Reckless Endangerment

##### **B. Burglary**

- 21. Burglary

##### **C. Simple Arson**

- 22.2 Simple Arson

##### **D. Forgery/Fraud**

- 24. Forgery/Fraud

##### **E. Theft**

- 23. Auto Theft
- 25. Grand Larceny – Theft Over \$200
- 26. Petty Larceny - Theft Under \$200
- 27. Larceny/Theft – Value Unknown
- 28. Embezzlement
- 29. Stolen Property – Receiving
- 30. Stolen Property – Trafficking
- 33. Unauthorized Use Of Vehicle
- 73.2 Public Order Offenses, Other – Theft

##### **F. Property Offenses**

- 31. Destruction Of Property
- 34. Trespassing
- 35. Property Offenses - Other

##### **G. Commercialized Vice, Illegal Substances**

- 36. Trafficking – Heroin
- 37. Trafficking - Cocaine Or Crack
- 38. Trafficking – Other Controlled Substances
- 39. Trafficking Marijuana/Hashish

40. Trafficking - Drug Unspecified

**H. Commercialized Vice, Other**

70. Commercialized Vice

72.1 Liquor Law Violations – Commercialized Vice

**I. Possession/Use/Other Violation Of Illegal Substance**

41. Possession/Use – Heroin

42. Possession/Use – Cocaine Or Crack

43. Possession/Use - Other Controlled Substances

44. Possession/Use - Marijuana/Hashish

45. Possession/Use - Drug Unspecified

46. Heroin Violation Offense Unspecified

47. Cocaine Or Crack Violation Offense Unspecified

48. Controlled Substance – Offense Unspecified

49. Marijuana/Hashish Violation - Offense Unspecified

50. Drug Offenses - Violation/Drug Unspecified

**J. Court-Ordered Violations**

51. Escape From Custody

52. Flight To Avoid Prosecution

54. Parole Violation

55. Probation Violations

58. Contempt Of Court

59. Offenses Against Courts, Legislatures And Commissions

68. Obstruction - Law Enforcement

**K. Weapon Offense**

53. Weapon Offense

**L. Traffic Offense – Minor**

60. Traffic Offenses – Minor

**M. Drunkenness/Vagrancy/Disorderly Conduct**

65. Drunkenness/Vagrancy/Disorderly Conduct

72.2 Liquor Law Violations, Other

**N. Military Specific Non-Violent Offenses**

88. Disobey Army Orders

89. AWOL/Desertion/Treason

**O. Family-Related Non-Violent Offenses**

58. Family Related Offenses – Contempt Of Court

64.1 Family Related Offenses – Reckless Endangerment

64.3 Family Related Offenses – Domestic Disturbance

64.4 Family Related Offenses – Custody Offenses

66.2 Family Related Offenses – Morals/Decency – Other Moral/Decency Offense

**P. Other Non-Violent Offenses**

20.4 Violent Offenses, Other – Non-Violent Offenses

57. Habitual Offender

66.2 Morals/Decency – Other Moral/Decency Offense

67. Immigration Violations

69.3 Invasion Of Privacy –Other

- 71. Contributing To The Delinquency Of A Minor
- 73.4 All Other Public Order Offenses
- 74. Bribery And Conflict Of Interest
- 75. Juvenile Offenses
- 76. Felony – Unspecified
- 77. Misdemeanor Unspecified
- 78. Other/Unknown

**TABLE S7. Association of documented mental health diagnoses<sup>a</sup> (day of suicide ideation and prior to suicide ideation) of active-duty U.S. Army soldiers with documented suicide attempt within 30 days following initial suicide ideation**

|                                       | Univariate      |                        | Suicide Ideators                                         |       |                                                                     |       | Total population<br>(n = 11,178) |
|---------------------------------------|-----------------|------------------------|----------------------------------------------------------|-------|---------------------------------------------------------------------|-------|----------------------------------|
|                                       | OR <sup>d</sup> | (95% CI <sup>d</sup> ) | Attempt suicide within 30 days <sup>b</sup><br>(n = 387) |       | Did not attempt suicide within 30 days <sup>c</sup><br>(n = 10,791) |       | %                                |
|                                       |                 |                        | n                                                        | %     | n                                                                   | %     |                                  |
| <b><u>Mental Health Diagnoses</u></b> |                 |                        |                                                          |       |                                                                     |       |                                  |
| <b>ADHD/ Learning Disorders</b>       |                 |                        |                                                          |       |                                                                     |       |                                  |
| Day of suicidal ideation              |                 |                        |                                                          |       |                                                                     |       |                                  |
| No                                    | 1.0             | –                      | 384                                                      | 99.22 | 10,579                                                              | 98.04 | 98.08                            |
| Yes                                   | 0.4             | (0.1–1.3)              | 3                                                        | 0.78  | 212                                                                 | 1.96  | 1.92                             |
|                                       | $\chi^2_1$      | 2.45                   |                                                          |       |                                                                     |       |                                  |
| Prior to suicidal ideation            |                 |                        |                                                          |       |                                                                     |       |                                  |
| No                                    | 1.0             | –                      | 365                                                      | 94.31 | 10,320                                                              | 95.64 | 95.59                            |
| Yes                                   | 1.4             | (0.9–2.1)              | 22                                                       | 5.68  | 471                                                                 | 4.36  | 4.41                             |
|                                       | $\chi^2_1$      | 1.88                   |                                                          |       |                                                                     |       |                                  |
| <b>Adjustment Disorder</b>            |                 |                        |                                                          |       |                                                                     |       |                                  |
| Day of suicidal ideation              |                 |                        |                                                          |       |                                                                     |       |                                  |
| No                                    | 1.0             | –                      | 322                                                      | 83.20 | 8,945                                                               | 82.89 | 82.90                            |
| Yes                                   | 1.0             | (0.7–1.3)              | 65                                                       | 16.80 | 1,846                                                               | 17.11 | 17.10                            |
|                                       | $\chi^2_1$      | 0.03                   |                                                          |       |                                                                     |       |                                  |
| Prior to suicidal ideation            |                 |                        |                                                          |       |                                                                     |       |                                  |
| No                                    | 1.0             | –                      | 286                                                      | 73.90 | 8,137                                                               | 75.41 | 75.35                            |
| Yes                                   | 1.1             | (0.9–1.4)              | 101                                                      | 26.10 | 2,654                                                               | 24.59 | 24.65                            |
|                                       | $\chi^2_1$      | 0.87                   |                                                          |       |                                                                     |       |                                  |
| <b>Alcohol Use Disorder</b>           |                 |                        |                                                          |       |                                                                     |       |                                  |
| Day of suicidal ideation              |                 |                        |                                                          |       |                                                                     |       |                                  |
| No                                    | 1.0             | –                      | 313                                                      | 80.88 | 8,676                                                               | 80.40 | 80.42                            |
| Yes                                   | 1.0             | (0.8–1.3)              | 74                                                       | 19.12 | 2,115                                                               | 19.60 | 19.58                            |
|                                       | $\chi^2_1$      | 0.02                   |                                                          |       |                                                                     |       |                                  |
| Prior to suicidal ideation            |                 |                        |                                                          |       |                                                                     |       |                                  |
| No                                    | 1.0             | –                      | 324                                                      | 83.72 | 8,777                                                               | 81.34 | 81.42                            |
| Yes                                   | 0.9             | (0.7–1.1)              | 63                                                       | 16.28 | 2,014                                                               | 18.66 | 18.58                            |
|                                       | $\chi^2_1$      | 0.95                   |                                                          |       |                                                                     |       |                                  |
| <b>Anxiety Disorder</b>               |                 |                        |                                                          |       |                                                                     |       |                                  |
| Day of suicidal ideation              |                 |                        |                                                          |       |                                                                     |       |                                  |
| No                                    | 1.0             | –                      | 333                                                      | 86.05 | 8,814                                                               | 81.68 | 81.83                            |
| Yes                                   | 0.7*            | (0.5–1.0)              | 54                                                       | 13.95 | 1,977                                                               | 18.32 | 18.17                            |
|                                       | $\chi^2_1$      | 4.54*                  |                                                          |       |                                                                     |       |                                  |
| Prior to suicidal ideation            |                 |                        |                                                          |       |                                                                     |       |                                  |
| No                                    | 1.0             | –                      | 246                                                      | 63.57 | 7,181                                                               | 66.55 | 66.44                            |
| Yes                                   | 1.2             | (1.0–1.5)              | 141                                                      | 36.43 | 3,610                                                               | 33.45 | 33.56                            |
|                                       | $\chi^2_1$      | 2.42                   |                                                          |       |                                                                     |       |                                  |
| <b>Bipolar Disorder</b>               |                 |                        |                                                          |       |                                                                     |       |                                  |

|                                                                   |            |           |     |        |        |       |       |
|-------------------------------------------------------------------|------------|-----------|-----|--------|--------|-------|-------|
| Day of suicidal ideation                                          |            |           |     |        |        |       |       |
| No                                                                | 1.0        | –         | 375 | 96.90  | 10,269 | 95.16 | 95.22 |
| Yes                                                               | 0.6        | (0.3–1.1) | 12  | 3.10   | 522    | 4.84  | 4.78  |
|                                                                   | $\chi^2_1$ | 2.55      |     |        |        |       |       |
| Prior to suicidal ideation                                        |            |           |     |        |        |       |       |
| No                                                                | 1.0        | –         | 374 | 96.64  | 10,338 | 95.80 | 95.83 |
| Yes                                                               | 0.8        | (0.5–1.4) | 13  | 3.36   | 453    | 4.20  | 4.17  |
|                                                                   | $\chi^2_1$ | 0.59      |     |        |        |       |       |
| <b>Conduct Disorder/<br/>Oppositional Defiant<br/>Disorder</b>    |            |           |     |        |        |       |       |
| Day of suicidal ideation                                          |            |           |     |        |        |       |       |
| No                                                                | 1.0        | –         | 377 | 97.42  | 10,586 | 98.10 | 98.08 |
| Yes                                                               | 1.4        | (0.7–2.6) | 10  | 2.58   | 205    | 1.90  | 1.92  |
|                                                                   | $\chi^2_1$ | 0.92      |     |        |        |       |       |
| Prior to suicidal ideation                                        |            |           |     |        |        |       |       |
| No                                                                | 1.0        | –         | 382 | 98.71  | 10,642 | 98.62 | 98.62 |
| Yes                                                               | 0.9        | (0.4–2.3) | 5   | 1.29   | 149    | 1.38  | 1.38  |
|                                                                   | $\chi^2_1$ | 0.02      |     |        |        |       |       |
| <b>Dysthymic Disorder /<br/>Neurasthenia / Depression<br/>NOS</b> |            |           |     |        |        |       |       |
| Day of suicidal ideation                                          |            |           |     |        |        |       |       |
| No                                                                | 1.0        | –         | 172 | 44.44  | 4,413  | 40.90 | 41.02 |
| Yes                                                               | 0.9        | (0.7–1.1) | 215 | 55.56  | 6,378  | 59.10 | 58.98 |
|                                                                   | $\chi^2_1$ | 1.92      |     |        |        |       |       |
| Prior to suicidal ideation                                        |            |           |     |        |        |       |       |
| No                                                                | 1.0        | –         | 208 | 53.75  | 6,146  | 56.95 | 56.84 |
| Yes                                                               | 1.2        | (0.9–1.4) | 179 | 46.25  | 4,645  | 43.05 | 43.16 |
|                                                                   | $\chi^2_1$ | 2.00      |     |        |        |       |       |
| <b>Major Depression</b>                                           |            |           |     |        |        |       |       |
| Day of suicidal ideation                                          |            |           |     |        |        |       |       |
| No                                                                | 1.0        | –         | 310 | 80.10  | 8,166  | 75.67 | 75.83 |
| Yes                                                               | 0.8        | (0.6–1.0) | 77  | 19.90  | 2,625  | 24.33 | 24.17 |
|                                                                   | $\chi^2_1$ | 3.81      |     |        |        |       |       |
| Prior to suicidal ideation                                        |            |           |     |        |        |       |       |
| No                                                                | 1.0        | –         | 331 | 85.53  | 9,129  | 84.60 | 84.63 |
| Yes                                                               | 0.9        | (0.7–1.3) | 56  | 14.47  | 1,662  | 15.40 | 15.37 |
|                                                                   | $\chi^2_1$ | 0.15      |     |        |        |       |       |
| <b>Eating Disorders</b>                                           |            |           |     |        |        |       |       |
| Day of suicidal ideation                                          |            |           |     |        |        |       |       |
| No                                                                | 1.0        | –         | 387 | 100.00 | 10,767 | 99.78 | 99.79 |
| Yes                                                               | –          | –         | 0   | 0.00   | 24     | 0.22  | 0.21  |
|                                                                   | $\chi^2_1$ | –         |     |        |        |       |       |
| Prior to suicidal ideation                                        |            |           |     |        |        |       |       |
| No                                                                | 1.0        | –         | 387 | 100.00 | 10,749 | 99.61 | 99.62 |
| Yes                                                               | –          | –         | 0   | 0.00   | 42     | 0.39  | 0.38  |
|                                                                   | $\chi^2_1$ | –         |     |        |        |       |       |
| <b>Stressors/Adversities</b>                                      |            |           |     |        |        |       |       |
| Day of suicidal ideation                                          |            |           |     |        |        |       |       |
| No                                                                | 1.0        | –         | 315 | 81.40  | 8,366  | 77.53 | 77.66 |

|                                        |            |           |     |       |        |       |       |
|----------------------------------------|------------|-----------|-----|-------|--------|-------|-------|
| Yes                                    | 0.8        | (0.6–1.0) | 72  | 18.60 | 2,425  | 22.47 | 22.34 |
|                                        | $\chi^2_1$ | 3.25      |     |       |        |       |       |
| Prior to suicidal ideation             |            |           |     |       |        |       |       |
| No                                     | 1.0        | –         | 272 | 70.28 | 7,263  | 67.31 | 67.41 |
| Yes                                    | 0.9        | (0.7–1.1) | 115 | 29.72 | 3,528  | 32.69 | 32.59 |
|                                        | $\chi^2_1$ | 1.22      |     |       |        |       |       |
| <b>Marital Problems</b>                |            |           |     |       |        |       |       |
| Day of suicidal ideation               |            |           |     |       |        |       |       |
| No                                     | 1.0        | –         | 367 | 94.83 | 10,061 | 93.24 | 93.29 |
| Yes                                    | 0.8        | (0.5–1.2) | 20  | 5.17  | 730    | 6.76  | 6.71  |
|                                        | $\chi^2_1$ | 1.30      |     |       |        |       |       |
| Prior to suicidal ideation             |            |           |     |       |        |       |       |
| No                                     | 1.0        | –         | 344 | 88.89 | 9,072  | 84.07 | 84.24 |
| Yes                                    | 0.7*       | (0.5–0.9) | 43  | 11.11 | 1,719  | 15.93 | 15.76 |
|                                        | $\chi^2_1$ | 5.69*     |     |       |        |       |       |
| <b>Non-Affective Psychosis</b>         |            |           |     |       |        |       |       |
| Day of suicidal ideation               |            |           |     |       |        |       |       |
| No                                     | 1.0        | –         | 369 | 95.35 | 10,308 | 95.52 | 95.52 |
| Yes                                    | 1.1        | (0.7–1.7) | 18  | 4.65  | 483    | 4.48  | 4.48  |
|                                        | $\chi^2_1$ | 0.06      |     |       |        |       |       |
| Prior to suicidal ideation             |            |           |     |       |        |       |       |
| No                                     | 1.0        | –         | 379 | 97.93 | 10,471 | 97.03 | 97.07 |
| Yes                                    | 0.7        | (0.3–1.4) | 8   | 2.07  | 320    | 2.97  | 2.93  |
|                                        | $\chi^2_1$ | 0.99      |     |       |        |       |       |
| <b>Organic Mental Disorders</b>        |            |           |     |       |        |       |       |
| Day of suicidal ideation               |            |           |     |       |        |       |       |
| No                                     | 1.0        | –         | 378 | 97.67 | 10,605 | 98.28 | 98.26 |
| Yes                                    | 1.4        | (0.7–2.7) | 9   | 2.33  | 186    | 1.72  | 1.74  |
|                                        | $\chi^2_1$ | 0.76      |     |       |        |       |       |
| Prior to suicidal ideation             |            |           |     |       |        |       |       |
| No                                     | 1.0        | –         | 369 | 95.35 | 10,398 | 96.36 | 96.32 |
| Yes                                    | 1.3        | (0.8–2.1) | 18  | 4.65  | 393    | 3.64  | 3.68  |
|                                        | $\chi^2_1$ | 1.27      |     |       |        |       |       |
| <b>Other Disorder</b>                  |            |           |     |       |        |       |       |
| Day of suicidal ideation               |            |           |     |       |        |       |       |
| No                                     | 1.0        | –         | 336 | 86.82 | 9,351  | 86.66 | 86.66 |
| Yes                                    | 1.0        | (0.7–1.3) | 51  | 13.18 | 1,440  | 13.34 | 13.34 |
|                                        | $\chi^2_1$ | 0.02      |     |       |        |       |       |
| Prior to suicidal ideation             |            |           |     |       |        |       |       |
| No                                     | 1.0        | –         | 357 | 92.25 | 9,756  | 90.41 | 90.47 |
| Yes                                    | 0.8        | (0.5–1.1) | 30  | 7.75  | 1,035  | 9.59  | 9.53  |
|                                        | $\chi^2_1$ | 1.72      |     |       |        |       |       |
| <b>Other Impulse Control Disorders</b> |            |           |     |       |        |       |       |
| Day of suicidal ideation               |            |           |     |       |        |       |       |
| No                                     | 1.0        | –         | 385 | 99.48 | 10,658 | 98.77 | 98.79 |
| Yes                                    | 0.4        | (0.1–1.7) | 2   | 0.52  | 133    | 1.23  | 1.21  |
|                                        | $\chi^2_1$ | 1.44      |     |       |        |       |       |
| Prior to suicidal ideation             |            |           |     |       |        |       |       |
| No                                     | 1.0        | –         | 385 | 99.48 | 10,640 | 98.60 | 98.63 |
| Yes                                    | 0.4        | (0.1–1.5) | 2   | 0.52  | 151    | 1.40  | 1.37  |

|                                           |            |           |     |        |        |       |       |  |
|-------------------------------------------|------------|-----------|-----|--------|--------|-------|-------|--|
|                                           | $\chi^2_1$ | 1.98      |     |        |        |       |       |  |
| <b>Personality Disorders</b>              |            |           |     |        |        |       |       |  |
| Day of suicidal ideation                  |            |           |     |        |        |       |       |  |
| No                                        | 1.0        | –         | 354 | 91.47  | 9,890  | 91.65 | 91.64 |  |
| Yes                                       | 1.0        | (0.7–1.4) | 33  | 8.53   | 901    | 8.35  | 8.36  |  |
|                                           | $\chi^2_1$ | 0.00      |     |        |        |       |       |  |
| Prior to suicidal ideation                |            |           |     |        |        |       |       |  |
| No                                        | 1.0        | –         | 357 | 92.25  | 10,069 | 93.31 | 93.27 |  |
| Yes                                       | 1.1        | (0.8–1.7) | 30  | 7.75   | 722    | 6.69  | 6.73  |  |
|                                           | $\chi^2_1$ | 0.45      |     |        |        |       |       |  |
| <b>Sexual Disorders</b>                   |            |           |     |        |        |       |       |  |
| Day of suicidal ideation                  |            |           |     |        |        |       |       |  |
| No                                        | 1.0        | –         | 387 | 100.00 | 10,774 | 99.84 | 99.85 |  |
| Yes                                       | –          | –         | 0   | 0.00   | 17     | 0.16  | 0.15  |  |
|                                           | $\chi^2_1$ | –         |     |        |        |       |       |  |
| Prior to suicidal ideation                |            |           |     |        |        |       |       |  |
| No                                        | 1.0        | –         | 385 | 99.48  | 10,652 | 98.71 | 98.74 |  |
| Yes                                       | 0.4        | (0.1–1.7) | 2   | 0.52   | 139    | 1.29  | 1.26  |  |
|                                           | $\chi^2_1$ | 1.52      |     |        |        |       |       |  |
| <b>Sleep Disorders</b>                    |            |           |     |        |        |       |       |  |
| Day of suicidal ideation                  |            |           |     |        |        |       |       |  |
| No                                        | 1.0        | –         | 378 | 97.67  | 10,664 | 98.82 | 98.78 |  |
| Yes                                       | 2.1*       | (1.0–4.1) | 9   | 2.33   | 127    | 1.18  | 1.22  |  |
|                                           | $\chi^2_1$ | 4.36*     |     |        |        |       |       |  |
| Prior to suicidal ideation                |            |           |     |        |        |       |       |  |
| No                                        | 1.0        | –         | 347 | 89.66  | 9,801  | 90.83 | 90.79 |  |
| Yes                                       | 1.2        | (0.9–1.7) | 40  | 10.34  | 990    | 9.17  | 9.21  |  |
|                                           | $\chi^2_1$ | 1.17      |     |        |        |       |       |  |
| <b>Somatoform/ Dissociative Disorders</b> |            |           |     |        |        |       |       |  |
| Day of suicidal ideation                  |            |           |     |        |        |       |       |  |
| No                                        | 1.0        | –         | 386 | 99.74  | 10,735 | 99.48 | 99.49 |  |
| Yes                                       | 0.5        | (0.1–3.5) | 1   | 0.26   | 56     | 0.52  | 0.51  |  |
|                                           | $\chi^2_1$ | 0.51      |     |        |        |       |       |  |
| Prior to suicidal ideation                |            |           |     |        |        |       |       |  |
| No                                        | 1.0        | –         | 373 | 96.38  | 10,314 | 95.58 | 95.61 |  |
| Yes                                       | 0.8        | (0.8–1.7) | 14  | 3.62   | 477    | 4.42  | 4.39  |  |
|                                           | $\chi^2_1$ | 0.58      |     |        |        |       |       |  |
| <b>TBI/ Postconcussion Syndrome</b>       |            |           |     |        |        |       |       |  |
| Day of suicidal ideation                  |            |           |     |        |        |       |       |  |
| No                                        | 1.0        | –         | 385 | 99.48  | 10,747 | 99.59 | 99.59 |  |
| Yes                                       | 1.4        | (0.3–5.7) | 2   | 0.52   | 44     | 0.41  | 0.41  |  |
|                                           | $\chi^2_1$ | 0.18      |     |        |        |       |       |  |
| Prior to suicidal ideation                |            |           |     |        |        |       |       |  |
| No                                        | 1.0        | –         | 376 | 97.16  | 10,385 | 96.24 | 96.27 |  |
| Yes                                       | 0.8        | (0.4–1.4) | 11  | 2.84   | 406    | 3.76  | 3.73  |  |
|                                           | $\chi^2_1$ | 0.60      |     |        |        |       |       |  |
| <b>Tobacco Use Disorder</b>               |            |           |     |        |        |       |       |  |
| Day of suicidal ideation                  |            |           |     |        |        |       |       |  |
| No                                        | 1.0        | –         | 320 | 82.69  | 8,870  | 82.20 | 82.22 |  |

|                                      |            |           |     |       |        |       |       |
|--------------------------------------|------------|-----------|-----|-------|--------|-------|-------|
| Yes                                  | 1.0        | (0.8–1.3) | 67  | 17.31 | 1,921  | 17.80 | 17.78 |
|                                      | $\chi^2_1$ | 0.00      |     |       |        |       |       |
| Prior to suicidal ideation           |            |           |     |       |        |       |       |
| No                                   | 1.0        | –         | 255 | 65.89 | 6,935  | 64.27 | 64.32 |
| Yes                                  | 1.0        | (0.8–1.2) | 132 | 34.11 | 3,856  | 35.73 | 35.68 |
|                                      | $\chi^2_1$ | 0.06      |     |       |        |       |       |
| <b>Traumatic Stress</b>              |            |           |     |       |        |       |       |
| Day of suicidal ideation             |            |           |     |       |        |       |       |
| No                                   | 1.0        | –         | 377 | 97.42 | 10,409 | 96.46 | 96.49 |
| Yes                                  | 0.7        | (0.4–1.4) | 10  | 2.58  | 382    | 3.54  | 3.51  |
|                                      | $\chi^2_1$ | 0.85      |     |       |        |       |       |
| Prior to suicidal ideation           |            |           |     |       |        |       |       |
| No                                   | 1.0        | –         | 358 | 92.51 | 9,960  | 92.30 | 92.31 |
| Yes                                  | 1.0        | (0.7–1.5) | 29  | 7.49  | 831    | 7.70  | 7.69  |
|                                      | $\chi^2_1$ | 0.00      |     |       |        |       |       |
| <b>PTSD</b>                          |            |           |     |       |        |       |       |
| Day of suicidal ideation             |            |           |     |       |        |       |       |
| No                                   | 1.0        | –         | 346 | 89.41 | 9,393  | 87.04 | 87.13 |
| Yes                                  | 0.8        | (0.6–1.1) | 41  | 10.59 | 1,398  | 12.96 | 12.87 |
|                                      | $\chi^2_1$ | 1.48      |     |       |        |       |       |
| Prior to suicidal ideation           |            |           |     |       |        |       |       |
| No                                   | 1.0        | –         | 339 | 87.60 | 9,343  | 86.58 | 86.62 |
| Yes                                  | 1.0        | (0.7–1.3) | 48  | 12.40 | 1,448  | 13.42 | 13.38 |
|                                      | $\chi^2_1$ | 0.09      |     |       |        |       |       |
| <b>Drug-Induced Mental Disorders</b> |            |           |     |       |        |       |       |
| Day of suicidal ideation             |            |           |     |       |        |       |       |
| No                                   | 1.0        | –         | 381 | 98.45 | 10,631 | 98.52 | 98.51 |
| Yes                                  | 1.1        | (0.5–2.4) | 6   | 1.55  | 160    | 1.48  | 1.49  |
|                                      | $\chi^2_1$ | 0.03      |     |       |        |       |       |
| Prior to suicidal ideation           |            |           |     |       |        |       |       |
| No                                   | 1.0        | –         | 378 | 97.67 | 10,433 | 96.68 | 96.72 |
| Yes                                  | 0.7        | (0.4–1.4) | 9   | 2.33  | 358    | 3.32  | 3.28  |
|                                      | $\chi^2_1$ | 0.93      |     |       |        |       |       |
| <b>Non-Dependent Drug Abuse</b>      |            |           |     |       |        |       |       |
| Day of suicidal ideation             |            |           |     |       |        |       |       |
| No                                   | 1.0        | –         | 356 | 91.99 | 10,050 | 93.13 | 93.09 |
| Yes                                  | 1.2        | (0.8–1.7) | 31  | 8.01  | 741    | 6.87  | 6.91  |
|                                      | $\chi^2_1$ | 0.86      |     |       |        |       |       |
| Prior to suicidal ideation           |            |           |     |       |        |       |       |
| No                                   | 1.0        | –         | 365 | 94.32 | 10,054 | 93.17 | 93.21 |
| Yes                                  | 0.8        | (0.5–1.3) | 22  | 5.68  | 737    | 6.83  | 6.79  |
|                                      | $\chi^2_1$ | 0.60      |     |       |        |       |       |
| <b>Drug Dependence</b>               |            |           |     |       |        |       |       |
| Day of suicidal ideation             |            |           |     |       |        |       |       |
| No                                   | 1.0        | –         | 373 | 96.38 | 10,440 | 96.75 | 96.73 |
| Yes                                  | 1.1        | (0.6–1.9) | 14  | 3.62  | 351    | 3.25  | 3.27  |
|                                      | $\chi^2_1$ | 0.14      |     |       |        |       |       |
| Prior to suicidal ideation           |            |           |     |       |        |       |       |
| No                                   | 1.0        | –         | 373 | 96.38 | 10,368 | 96.08 | 96.09 |



|                                                      |            |            |     |        |        |       |       |
|------------------------------------------------------|------------|------------|-----|--------|--------|-------|-------|
| Yes                                                  | 0.9        | (0.5–1.6)  | 14  | 3.62   | 423    | 3.92  | 3.91  |
|                                                      | $\chi^2_1$ | 0.07       |     |        |        |       |       |
| <b>Indicator of Impulsivity &amp; Risky Behavior</b> |            |            |     |        |        |       |       |
| Day of suicidal ideation                             |            |            |     |        |        |       |       |
| No                                                   | 1.0        | –          | 29  | 7.49   | 902    | 8.36  | 8.33  |
| Yes                                                  | 1.1        | (0.7–1.6)  | 358 | 92.51  | 9,889  | 91.64 | 91.67 |
|                                                      | $\chi^2_1$ | 0.17       |     |        |        |       |       |
| Prior to suicidal ideation                           |            |            |     |        |        |       |       |
| No                                                   | 1.0        | –          | 387 | 100.00 | 10,786 | 99.95 | 99.96 |
| Yes                                                  | –          | –          | 0   | 0.00   | 5      | 0.05  | 0.04  |
|                                                      | $\chi^2_1$ | –          |     |        |        |       |       |
| <b>Self-Damaging Behavior</b>                        |            |            |     |        |        |       |       |
| Day of suicidal ideation                             |            |            |     |        |        |       |       |
| No                                                   | 1.0        | –          | 386 | 99.74  | 10,780 | 99.90 | 99.89 |
| Yes                                                  | 3.1        | (0.4–24.5) | 1   | 0.26   | 11     | 0.10  | 0.11  |
|                                                      | $\chi^2_1$ | 1.19       |     |        |        |       |       |
| Prior to suicidal ideation                           |            |            |     |        |        |       |       |
| No                                                   | 1.0        | –          | 386 | 99.74  | 10,746 | 99.58 | 99.59 |
| Yes                                                  | 0.6        | (0.1–4.6)  | 1   | 0.26   | 45     | 0.42  | 0.41  |
|                                                      | $\chi^2_1$ | 0.21       |     |        |        |       |       |

<sup>a</sup>Table S3 includes all ICD-9-CM codes associated with each mental disorder

<sup>b</sup>Soldiers with first-time documented suicide ideation who subsequently attempted suicide within the next 30 days of recorded ideation

<sup>c</sup>Soldiers with first-time documented suicide ideation who did not subsequently attempt suicide within the next 30 days

<sup>d</sup>OR = Odds ratio; CI = Confidence interval

\* $p < .05$

**TABLE S8. Association of family violence and crime of active-duty U.S. Army soldiers with documented suicide attempt within 30 days following initial suicide ideation**

|                                                       | Univariate      |                        | Suicide Ideators                                         |       |                                                                        |       | Total population<br>(n = 11,178) |
|-------------------------------------------------------|-----------------|------------------------|----------------------------------------------------------|-------|------------------------------------------------------------------------|-------|----------------------------------|
|                                                       | OR <sup>c</sup> | (95% CI <sup>c</sup> ) | Attempt suicide within<br>30 days <sup>a</sup> (n = 387) |       | Did not attempt<br>suicide within 30 days <sup>b</sup><br>(n = 10,791) |       | %                                |
|                                                       |                 |                        | n                                                        | %     | n                                                                      | %     |                                  |
| <b><u>Family Violence</u></b>                         |                 |                        |                                                          |       |                                                                        |       |                                  |
| Yes                                                   | 0.9             | (0.5–1.4)              | 18                                                       | 4.65  | 593                                                                    | 5.50  | 5.47                             |
| No                                                    | 1.0             | –                      | 369                                                      | 95.35 | 10,198                                                                 | 94.50 | 94.53                            |
|                                                       | $\chi^2_1$      | 0.32                   |                                                          |       |                                                                        |       |                                  |
| <b>Family Violence Role</b>                           |                 |                        |                                                          |       |                                                                        |       |                                  |
| Perpetrator                                           | 0.8             | (0.5–1.5)              | 13                                                       | 3.36  | 445                                                                    | 4.12  | 4.10                             |
| Victim only                                           | 1.0             | (0.4–2.3)              | 5                                                        | 1.29  | 148                                                                    | 1.37  | 1.37                             |
| None                                                  | 1.0             | –                      | 369                                                      | 95.35 | 10,198                                                                 | 94.50 | 94.53                            |
|                                                       | $\chi^2_2$      | 0.37                   |                                                          |       |                                                                        |       |                                  |
| <b># Family Violence Incidents</b>                    |                 |                        |                                                          |       |                                                                        |       |                                  |
| 2+ episodes                                           | 0.9             | (0.4–2.2)              | 6                                                        | 1.55  | 186                                                                    | 1.72  | 1.72                             |
| 1 episode                                             | 0.8             | (0.5–1.5)              | 12                                                       | 3.10  | 407                                                                    | 3.77  | 3.75                             |
| None                                                  | 1.0             | –                      | 369                                                      | 95.35 | 10,198                                                                 | 94.50 | 94.53                            |
|                                                       | $\chi^2_2$      | 0.38                   |                                                          |       |                                                                        |       |                                  |
| <b>Time Since Most Recent Family Violence Episode</b> |                 |                        |                                                          |       |                                                                        |       |                                  |
| Never                                                 | 1.0             | –                      | 369                                                      | 95.35 | 10,198                                                                 | 94.50 | 94.53                            |
| 1 month                                               | 1.1             | (0.4–3.0)              | 4                                                        | 1.03  | 105                                                                    | 0.97  | 0.98                             |
| 2-3 months                                            | 0.9             | (0.3–2.4)              | 4                                                        | 1.03  | 130                                                                    | 1.20  | 1.20                             |
| 4-12 months                                           | 1.0             | (0.4–2.3)              | 6                                                        | 1.55  | 168                                                                    | 1.56  | 1.56                             |
| 13+ months                                            | 0.6             | (0.2–1.7)              | 4                                                        | 1.03  | 190                                                                    | 1.76  | 1.74                             |
|                                                       | $\chi^2_4$      | 1.02                   |                                                          |       |                                                                        |       |                                  |
| <b><u>Crime Perpetration</u></b>                      |                 |                        |                                                          |       |                                                                        |       |                                  |
| Violent, major                                        | 1.4             | (0.9–2.4)              | 16                                                       | 4.13  | 323                                                                    | 2.99  | 3.03                             |
| Violent, minor                                        | 1.0             | (0.5–1.9)              | 10                                                       | 2.58  | 288                                                                    | 2.67  | 2.67                             |
| Non-violent                                           | 1.0             | (0.7–1.3)              | 67                                                       | 17.31 | 1,946                                                                  | 18.03 | 18.01                            |
| None                                                  | 1.0             | –                      | 294                                                      | 75.97 | 8,234                                                                  | 76.30 | 76.29                            |
|                                                       | $\chi^2_3$      | 1.98                   |                                                          |       |                                                                        |       |                                  |
| <b><u>Crime Victimization</u></b>                     |                 |                        |                                                          |       |                                                                        |       |                                  |
| Violent, major                                        | 1.1             | (0.6–2.2)              | 9                                                        | 2.33  | 225                                                                    | 2.09  | 2.09                             |
| Violent, minor                                        | 1.3             | (0.6–2.6)              | 8                                                        | 2.07  | 179                                                                    | 1.66  | 1.67                             |
| Non-violent                                           | 0.7             | (0.4–1.3)              | 14                                                       | 3.62  | 545                                                                    | 5.05  | 5.00                             |
| None                                                  | 1.0             | –                      | 356                                                      | 91.99 | 9,842                                                                  | 91.21 | 91.23                            |
|                                                       | $\chi^2_3$      | 1.90                   |                                                          |       |                                                                        |       |                                  |
| <b><u>Physical Healthcare &amp; Injury Visits</u></b> |                 |                        |                                                          |       |                                                                        |       |                                  |

|                                                          |            |             |     |       |        |       |       |
|----------------------------------------------------------|------------|-------------|-----|-------|--------|-------|-------|
| Days with Outpatient Visit in Past 2 Months <sup>d</sup> | 1.01       | (0.99–1.03) |     |       |        |       |       |
| 0                                                        |            |             | 64  | 16.54 | 2,153  | 19.95 | 19.83 |
| 1                                                        |            |             | 71  | 18.78 | 1,573  | 14.58 | 14.71 |
| 2                                                        |            |             | 50  | 12.92 | 1,464  | 13.57 | 13.54 |
| 3                                                        |            |             | 35  | 9.04  | 1,162  | 10.77 | 10.71 |
| 4                                                        |            |             | 28  | 7.24  | 952    | 8.82  | 8.77  |
| 5                                                        |            |             | 31  | 8.01  | 705    | 6.53  | 6.58  |
| 6                                                        |            |             | 23  | 5.94  | 578    | 5.36  | 5.38  |
| 7                                                        |            |             | 20  | 5.17  | 410    | 3.80  | 3.85  |
| 8+                                                       |            |             | 65  | 16.80 | 1,794  | 16.62 | 16.63 |
|                                                          | $\chi^2_8$ | 0.58        |     |       |        |       |       |
| <b><u>Injury-Related Healthcare Visit</u></b>            |            |             |     |       |        |       |       |
| Any Inpatient Visit for Injury                           | 1.0        | (0.6–1.6)   | 21  | 5.43  | 649    | 6.01  | 5.99  |
| Only Outpatient Visit                                    | 1.1        | (0.9–1.4)   | 288 | 74.42 | 7,826  | 72.52 | 72.59 |
| No Visit for Injury                                      | 1.0        | –           | 78  | 20.16 | 2,316  | 21.46 | 21.42 |
|                                                          | $\chi^2_2$ | 0.90        |     |       |        |       |       |
| Combat Injury                                            |            |             |     |       |        |       |       |
| Yes                                                      | 0.9        | (0.4–1.9)   | 7   | 1.81  | 230    | 2.13  | 2.12  |
| No                                                       | 1.0        | –           | 384 | 98.19 | 10,561 | 97.87 | 97.92 |
|                                                          | $\chi^2_1$ | 0.13        |     |       |        |       |       |

<sup>a</sup>Cases: Soldiers with first-time documented suicide ideation who subsequently attempted suicide within the next 30 days of recorded ideation

<sup>b</sup>Controls: Soldiers with first-time documented suicide ideation who did not subsequently attempt suicide within the next 30 days

<sup>c</sup>OR = Odds ratio; CI = Confidence interval

<sup>d</sup>Days with outpatient visits in past 2 months included the following categories: 0, 1, 2, 3, 4, 5, 6, 7, 8+

\* $p < .05$

**TABLE S9. Multivariate associations of socio-demographic and service-related characteristics in active-duty U.S. Army soldiers with documented suicide attempt within 30 days following initial suicide ideation<sup>a</sup>**

|                                                 |                    | <b>OR<sup>b</sup></b> | <b>(95% CI<sup>b</sup>)</b> |
|-------------------------------------------------|--------------------|-----------------------|-----------------------------|
| <b><u>Socio-demographic characteristics</u></b> |                    |                       |                             |
| Gender                                          |                    |                       |                             |
|                                                 | Male               | 1.0                   | –                           |
|                                                 | Female             | 1.4*                  | (1.1-1.8)                   |
|                                                 | $\chi^2_1$         |                       | 6.20*                       |
| Current Age                                     |                    |                       |                             |
|                                                 | < 21               | 1.4                   | (0.6-2.9)                   |
|                                                 | 21-24              | 1.4                   | (0.7-2.7)                   |
|                                                 | 25-29              | 1.5                   | (0.8-2.5)                   |
|                                                 | 30-34              | 1.0                   | –                           |
|                                                 | 35-39              | 0.9                   | (0.4-2.0)                   |
|                                                 | 40+                | 1.3                   | (0.5-3.4)                   |
|                                                 | $\chi^2_5$         |                       | 2.91                        |
| Race/Ethnicity                                  |                    |                       |                             |
|                                                 | White              | 1.0                   | –                           |
|                                                 | Black              | 0.6*                  | (0.4-0.9)                   |
|                                                 | Hispanic           | 1.2                   | (0.8-1.6)                   |
|                                                 | Other              | 0.6                   | (0.4-1.2)                   |
|                                                 | $\chi^2_3$         |                       | 10.43*                      |
| Education                                       |                    |                       |                             |
|                                                 | < High school      | 1.1                   | (0.9-1.4)                   |
|                                                 | High school        | 1.0                   | –                           |
|                                                 | Some college       | 1.3                   | (0.7-2.7)                   |
|                                                 | ≥ College          | 1.2                   | (0.5-2.7)                   |
|                                                 | $\chi^2_3$         |                       | 1.66                        |
| Marital Status                                  |                    |                       |                             |
|                                                 | Never married      | 1.0                   | –                           |
|                                                 | Currently married  | 1.3*                  | (1.0-1.6)                   |
|                                                 | Previously married | 1.3                   | (0.6-2.8)                   |
|                                                 | $\chi^2_2$         |                       | 4.09                        |
| <b><u>Service-related Characteristics</u></b>   |                    |                       |                             |
| Age at Army Entry                               |                    |                       |                             |
|                                                 | < 21               | 1.2                   | (0.9-1.6)                   |
|                                                 | 21-24              | 1.0                   | –                           |
|                                                 | 25+                | 1.1                   | (0.7-1.8)                   |
|                                                 | $\chi^2_2$         |                       | 1.10                        |
| Time in Service                                 |                    |                       |                             |
|                                                 | 1-2 years          | 1.1                   | (0.6-2.0)                   |
|                                                 | 3-4 years          | 1.1                   | (0.7-1.6)                   |
|                                                 | 5-10 years         | 1.0                   | –                           |
|                                                 | > 10 years         | 0.7                   | (0.3-1.5)                   |
|                                                 | $\chi^2_3$         |                       | 0.98                        |
| Deployment Status                               |                    |                       |                             |
|                                                 | Never              | 1.0                   | –                           |
|                                                 | Current            | 0.9                   | (0.6-1.5)                   |

|                                           |      |           |
|-------------------------------------------|------|-----------|
| Previous                                  | 1.1  | (0.8-1.5) |
| $\chi^2_2$                                |      | 0.34      |
| Demotion                                  |      |           |
| Past year                                 | 0.9  | (0.5-1.4) |
| Before past year                          | 1.0  | (0.7-1.6) |
| Never demoted                             | 1.0  | –         |
| $\chi^2_2$                                |      | 0.34      |
| Delayed Promotion                         |      |           |
| On schedule                               | 1.0  | –         |
| Late: < 2 months                          | 1.3  | (0.7-2.2) |
| Late: > 2 months                          | 0.8  | (0.5-1.4) |
| Not relevant because of rank <sup>c</sup> | 0.8  | (0.5-1.2) |
| $\chi^2_3$                                |      | 2.89      |
| Military Occupational Specialty (MOS)     |      |           |
| Combat arms <sup>d</sup>                  | 1.1  | (0.8-1.4) |
| Combat medics                             | 1.6* | (1.1-2.3) |
| Other MOS                                 | 1.0  | –         |
| $\chi^2_2$                                |      | 6.82*     |

<sup>a</sup>Multivariate model was adjusted for socio-demographics (gender, current age, race, education, and marital status) and service-related characteristics.

<sup>b</sup>OR = Odds ratio; CI = Confidence interval

<sup>c</sup>Soldiers above the rank of E4 are not promoted on a set schedule.

<sup>d</sup>Combat Arms includes Combat Arms and Special Forces soldiers.

\*p < .05

**TABLE S10. Multivariate associations of documented mental health diagnoses<sup>a</sup> (day of suicide ideation and prior to suicide ideation) of active-duty U.S. Army soldiers with documented suicide attempt within 30 days following initial suicide ideation<sup>b</sup>**

|                                 | OR <sup>c</sup> | (95% CI <sup>c</sup> ) |
|---------------------------------|-----------------|------------------------|
| <b>Mental Health Diagnoses</b>  |                 |                        |
| <b>ADHD/ Learning Disorders</b> |                 |                        |
| Day of suicidal ideation        |                 |                        |
| No                              | 1.0             | –                      |
| Yes                             | 0.4             | (0.1–1.2)              |
| $\chi^2_1$                      |                 | 2.60                   |
| Prior to suicidal ideation      |                 |                        |
| No                              | 1.0             | –                      |
| Yes                             | 1.4             | (0.9–2.2)              |
| $\chi^2_1$                      |                 | 2.30                   |
| <b>Adjustment Disorder</b>      |                 |                        |
| Day of suicidal ideation        |                 |                        |
| No                              | 1.0             | –                      |
| Yes                             | 1.0             | (0.7–1.3)              |
| $\chi^2_1$                      |                 | 0.10                   |
| Prior to suicidal ideation      |                 |                        |
| No                              | 1.0             | –                      |
| Yes                             | 1.2             | (0.9–1.5)              |
| $\chi^2_1$                      |                 | 1.50                   |
| <b>Alcohol Use Disorder</b>     |                 |                        |
| Day of suicidal ideation        |                 |                        |
| No                              | 1.0             | –                      |
| Yes                             | 1.0             | (0.8–1.4)              |
| $\chi^2_1$                      |                 | 0.10                   |
| Prior to suicidal ideation      |                 |                        |
| No                              | 1.0             | –                      |
| Yes                             | 1.0             | (0.7–1.3)              |
| $\chi^2_1$                      |                 | 0.00                   |
| <b>Anxiety Disorder</b>         |                 |                        |
| Day of suicidal ideation        |                 |                        |
| No                              | 1.0             | –                      |
| Yes                             | 0.7*            | (0.5–1.0)              |
| $\chi^2_1$                      |                 | 4.60*                  |
| Prior to suicidal ideation      |                 |                        |
| No                              | 1.0             | –                      |
| Yes                             | 1.3*            | (1.0–1.6)              |
| $\chi^2_1$                      |                 | 4.10*                  |
| <b>Bipolar Disorder</b>         |                 |                        |
| Day of suicidal ideation        |                 |                        |
| No                              | 1.0             | –                      |
| Yes                             | 0.6             | (0.3–1.1)              |
| $\chi^2_1$                      |                 | 3.20                   |
| Prior to suicidal ideation      |                 |                        |
| No                              | 1.0             | –                      |
| Yes                             | 0.8             | (0.5–1.4)              |
| $\chi^2_1$                      |                 | 0.50                   |

**Conduct Disorder/  
Oppositional Defiant Disorder**

|                            |            |      |           |
|----------------------------|------------|------|-----------|
| Day of suicidal ideation   |            |      |           |
| No                         | 1.0        |      | –         |
| Yes                        | 1.4        |      | (0.7–2.6) |
|                            | $\chi^2_1$ | 0.90 |           |
| Prior to suicidal ideation |            |      |           |
| No                         | 1.0        |      | –         |
| Yes                        | 1.0        |      | (0.4–2.4) |
|                            | $\chi^2_1$ | 0.0  |           |

**Dysthymic Disorder /  
Neurasthenia / Depression  
NOS**

|                            |            |      |           |
|----------------------------|------------|------|-----------|
| Day of suicidal ideation   |            |      |           |
| No                         | 1.0        |      | –         |
| Yes                        | 0.9        |      | (0.7–1.0) |
|                            | $\chi^2_1$ | 2.30 |           |
| Prior to suicidal ideation |            |      |           |
| No                         | 1.0        |      | –         |
| Yes                        | 1.2        |      | (1.0–1.5) |
|                            | $\chi^2_1$ | 3.80 |           |

**Major Depression**

|                            |            |      |           |
|----------------------------|------------|------|-----------|
| Day of suicidal ideation   |            |      |           |
| No                         | 1.0        |      | –         |
| Yes                        | 0.8        |      | (0.6–1.0) |
|                            | $\chi^2_1$ | 2.70 |           |
| Prior to suicidal ideation |            |      |           |
| No                         | 1.0        |      | –         |
| Yes                        | 1.0        |      | (0.8–1.4) |
|                            | $\chi^2_1$ | 0.10 |           |

**Eating Disorders**

|                            |            |   |   |
|----------------------------|------------|---|---|
| Day of suicidal ideation   |            |   |   |
| No                         | 1.0        |   | – |
| Yes                        | –          |   | – |
|                            | $\chi^2_1$ | – |   |
| Prior to suicidal ideation |            |   |   |
| No                         | 1.0        |   | – |
| Yes                        | –          |   | – |
|                            | $\chi^2_1$ | – |   |

**Stressors/Adversities**

|                            |            |      |           |
|----------------------------|------------|------|-----------|
| Day of suicidal ideation   |            |      |           |
| No                         | 1.0        |      | –         |
| Yes                        | 0.8        |      | (0.6–1.0) |
|                            | $\chi^2_1$ | 3.20 |           |
| Prior to suicidal ideation |            |      |           |
| No                         | 1.0        |      | –         |
| Yes                        | 1.0        |      | (0.8–1.3) |
|                            | $\chi^2_1$ | 0.00 |           |

**Marital Problems**

|                          |     |  |   |
|--------------------------|-----|--|---|
| Day of suicidal ideation |     |  |   |
| No                       | 1.0 |  | – |

|                                        |            |     |           |
|----------------------------------------|------------|-----|-----------|
| Yes                                    |            | 0.8 | (0.5–1.3) |
|                                        | $\chi^2_1$ |     | 0.70      |
| Prior to suicidal ideation             |            |     |           |
| No                                     |            | 1.0 | –         |
| Yes                                    |            | 0.7 | (0.5–1.0) |
|                                        | $\chi^2_1$ |     | 3.10      |
| <b>Non-Affective Psychosis</b>         |            |     |           |
| Day of suicidal ideation               |            |     |           |
| No                                     |            | 1.0 | –         |
| Yes                                    |            | 1.1 | (0.7–1.8) |
|                                        | $\chi^2_1$ |     | 0.30      |
| Prior to suicidal ideation             |            |     |           |
| No                                     |            | 1.0 | –         |
| Yes                                    |            | 0.8 | (0.4–1.6) |
|                                        | $\chi^2_1$ |     | 0.40      |
| <b>Organic Mental Disorders</b>        |            |     |           |
| Day of suicidal ideation               |            |     |           |
| No                                     |            | 1.0 | –         |
| Yes                                    |            | 1.5 | (0.8–3.0) |
|                                        | $\chi^2_1$ |     | 1.40      |
| Prior to suicidal ideation             |            |     |           |
| No                                     |            | 1.0 | –         |
| Yes                                    |            | 1.5 | (0.9–2.5) |
|                                        | $\chi^2_1$ |     | 3.00      |
| <b>Other Disorder</b>                  |            |     |           |
| Day of suicidal ideation               |            |     |           |
| No                                     |            | 1.0 | –         |
| Yes                                    |            | 1.0 | (0.7–1.3) |
|                                        | $\chi^2_1$ |     | 0.00      |
| Prior to suicidal ideation             |            |     |           |
| No                                     |            | 1.0 | –         |
| Yes                                    |            | 0.8 | (0.5–1.2) |
|                                        | $\chi^2_1$ |     | 1.50      |
| <b>Other Impulse Control Disorders</b> |            |     |           |
| Day of suicidal ideation               |            |     |           |
| No                                     |            | 1.0 | –         |
| Yes                                    |            | 0.5 | (0.1–1.9) |
|                                        | $\chi^2_1$ |     | 1.20      |
| Prior to suicidal ideation             |            |     |           |
| No                                     |            | 1.0 | –         |
| Yes                                    |            | 0.4 | (0.1–1.6) |
|                                        | $\chi^2_1$ |     | 1.80      |
| <b>Personality Disorders</b>           |            |     |           |
| Day of suicidal ideation               |            |     |           |
| No                                     |            | 1.0 | –         |
| Yes                                    |            | 0.9 | (0.7–1.4) |
|                                        | $\chi^2_1$ |     | 0.10      |
| Prior to suicidal ideation             |            |     |           |
| No                                     |            | 1.0 | –         |
| Yes                                    |            | 1.2 | (0.8–1.7) |



|                                           |            |           |  |
|-------------------------------------------|------------|-----------|--|
|                                           | $\chi^2_1$ | 0.70      |  |
| <b>Sexual Disorders</b>                   |            |           |  |
| Day of suicidal ideation                  |            |           |  |
| No                                        | 1.0        | –         |  |
| Yes                                       | –          | –         |  |
|                                           | $\chi^2_1$ | –         |  |
| Prior to suicidal ideation                |            |           |  |
| No                                        | 1.0        | –         |  |
| Yes                                       | 0.6        | (0.1–2.4) |  |
|                                           | $\chi^2_1$ | 0.60      |  |
| <b>Sleep Disorders</b>                    |            |           |  |
| Day of suicidal ideation                  |            |           |  |
| No                                        | 1.0        | –         |  |
| Yes                                       | 2.2*       | (1.1–4.3) |  |
|                                           | $\chi^2_1$ | 4.70*     |  |
| Prior to suicidal ideation                |            |           |  |
| No                                        | 1.0        | –         |  |
| Yes                                       | 1.4        | (1.0–1.9) |  |
|                                           | $\chi^2_1$ | 3.10      |  |
| <b>Somatoform/ Dissociative Disorders</b> |            |           |  |
| Day of suicidal ideation                  |            |           |  |
| No                                        | 1.0        | –         |  |
| Yes                                       | 0.5        | (0.1–3.6) |  |
|                                           | $\chi^2_1$ | 0.50      |  |
| Prior to suicidal ideation                |            |           |  |
| No                                        | 1.0        | –         |  |
| Yes                                       | 0.9        | (0.5–1.6) |  |
|                                           | $\chi^2_1$ | 0.10      |  |
| <b>TBI/ Postconcussion Syndrome</b>       |            |           |  |
| Day of suicidal ideation                  |            |           |  |
| No                                        | 1.0        | –         |  |
| Yes                                       | 1.5        | (0.4–6.4) |  |
|                                           | $\chi^2_1$ | 0.30      |  |
| Prior to suicidal ideation                |            |           |  |
| No                                        | 1.0        | –         |  |
| Yes                                       | 0.9        | (0.5–1.6) |  |
|                                           | $\chi^2_1$ | 0.20      |  |
| <b>Tobacco Use Disorder</b>               |            |           |  |
| Day of suicidal ideation                  |            |           |  |
| No                                        | 1.0        | –         |  |
| Yes                                       | 1.0        | (0.8–1.3) |  |
|                                           | $\chi^2_1$ | 0.00      |  |
| Prior to suicidal ideation                |            |           |  |
| No                                        | 1.0        | –         |  |
| Yes                                       | 1.0        | (0.8–1.3) |  |
|                                           | $\chi^2_1$ | 0.10      |  |
| <b>Traumatic Stress</b>                   |            |           |  |
| Day of suicidal ideation                  |            |           |  |
| No                                        | 1.0        | –         |  |
| Yes                                       | 0.7        | (0.4–1.4) |  |

|                                                      |            |           |  |
|------------------------------------------------------|------------|-----------|--|
|                                                      | $\chi^2_1$ | 1.00      |  |
| Prior to suicidal ideation                           |            |           |  |
| No                                                   | 1.0        | –         |  |
| Yes                                                  | 1.0        | (0.7–1.5) |  |
|                                                      | $\chi^2_1$ | 0.00      |  |
| <b>PTSD</b>                                          |            |           |  |
| Day of suicidal ideation                             |            |           |  |
| No                                                   | 1.0        | –         |  |
| Yes                                                  | 0.9        | (0.6–1.3) |  |
|                                                      | $\chi^2_1$ | 0.50      |  |
| Prior to suicidal ideation                           |            |           |  |
| No                                                   | 1.0        | –         |  |
| Yes                                                  | 1.1        | (0.8–1.5) |  |
|                                                      | $\chi^2_1$ | 0.20      |  |
| <b>Drug-Induced Mental Disorders</b>                 |            |           |  |
| Day of suicidal ideation                             |            |           |  |
| No                                                   | 1.0        | –         |  |
| Yes                                                  | 1.2        | (0.5–2.6) |  |
|                                                      | $\chi^2_1$ | 0.10      |  |
| Prior to suicidal ideation                           |            |           |  |
| No                                                   | 1.0        | –         |  |
| Yes                                                  | 0.8        | (0.4–1.6) |  |
|                                                      | $\chi^2_1$ | 0.40      |  |
| <b>Non-Dependent Drug Abuse</b>                      |            |           |  |
| Day of suicidal ideation                             |            |           |  |
| No                                                   | 1.0        | –         |  |
| Yes                                                  | 1.2        | (0.8–1.7) |  |
|                                                      | $\chi^2_1$ | 0.80      |  |
| Prior to suicidal ideation                           |            |           |  |
| No                                                   | 1.0        | –         |  |
| Yes                                                  | 0.9        | (0.6–1.4) |  |
|                                                      | $\chi^2_1$ | 0.30      |  |
| <b>Drug Dependence</b>                               |            |           |  |
| Day of suicidal ideation                             |            |           |  |
| No                                                   | 1.0        | –         |  |
| Yes                                                  | 1.1        | (0.6–1.9) |  |
|                                                      | $\chi^2_1$ | 0.10      |  |
| Prior to suicidal ideation                           |            |           |  |
| No                                                   | 1.0        | –         |  |
| Yes                                                  | 1.0        | (0.6–1.8) |  |
|                                                      | $\chi^2_1$ | 0.00      |  |
| <b>Indicator of Impulsivity &amp; Risky Behavior</b> |            |           |  |
| Day of suicidal ideation                             |            |           |  |
| No                                                   | 1.0        | –         |  |
| Yes                                                  | 1.1        | (0.7–1.6) |  |
|                                                      | $\chi^2_1$ | 0.10      |  |
| Prior to suicidal ideation                           |            |           |  |
| No                                                   | 1.0        | –         |  |
| Yes                                                  | –          | –         |  |

| <b>Self-Damaging Behavior</b> |            | $\chi^2_1$ | –          |
|-------------------------------|------------|------------|------------|
| Day of suicidal ideation      |            |            |            |
| No                            |            | 1.0        | –          |
| Yes                           |            | 2.8        | (0.4–22.1) |
|                               | $\chi^2_1$ |            | 0.9        |
| Prior to suicidal ideation    |            |            |            |
| No                            |            | 1.0        | –          |
| Yes                           |            | 0.7        | (0.1–5.1)  |
|                               | $\chi^2_1$ |            | 0.1        |

<sup>a</sup>Table S3 includes all ICD-9-CM codes associated with each mental disorder

<sup>b</sup>Multivariate model was adjusted for socio-demographics (gender, current age, race, education, and marital status) and service-related characteristics.

<sup>c</sup>OR = Odds ratio; CI = Confidence interval

\* $p < .05$

**TABLE S11. Multivariate associations of crime and family violence characteristics and healthcare factors in active-duty U.S. Army soldiers with documented suicide attempt within 30 days following initial suicide ideation<sup>ab</sup>**

|                                                          | <b>OR<sup>c</sup></b> | <b>(95% CI<sup>c</sup>)</b> |
|----------------------------------------------------------|-----------------------|-----------------------------|
| <b><u>Family violence</u></b>                            |                       |                             |
| Yes                                                      | 0.9                   | (0.6–1.6)                   |
| No                                                       | 1.0                   | –                           |
|                                                          |                       | $\chi^2_1$ 0.05             |
| Family Violence Role                                     |                       |                             |
| Perpetrator                                              | 1.0                   | (0.5–1.7)                   |
| Victim only                                              | 0.9                   | (0.4–2.2)                   |
| None                                                     | 1.0                   | –                           |
|                                                          |                       | $\chi^2_2$ 0.08             |
| # Family Violence Incidents                              |                       |                             |
| 2+ episodes                                              | 1.0                   | (0.4–2.4)                   |
| 1 episode                                                | 0.9                   | (0.5–1.6)                   |
| None                                                     | 1.0                   | –                           |
|                                                          |                       | $\chi^2_2$ 0.11             |
| Time Since Most Recent Family Violence Episode           |                       |                             |
| Never                                                    | 1.0                   | –                           |
| 1 month                                                  | 1.2                   | (0.4–3.2)                   |
| 2-3 months                                               | 0.9                   | (0.3–2.4)                   |
| 4-12 months                                              | 1.0                   | (0.5–2.4)                   |
| 13+ months                                               | 0.8                   | (0.3–2.1)                   |
|                                                          |                       | $\chi^2_4$ 0.45             |
| <b><u>Crime Perpetration</u></b>                         |                       |                             |
| Violent, major                                           | 1.8*                  | (1.1–3.1)                   |
| Violent, minor                                           | 1.2                   | (0.6–2.2)                   |
| Non-violent                                              | 1.1                   | (0.8–1.4)                   |
| None                                                     | 1.0                   | –                           |
|                                                          |                       | $\chi^2_3$ 5.01             |
| <b><u>Crime Victimization</u></b>                        |                       |                             |
| Violent, major                                           | 1.0                   | (0.5–2.0)                   |
| Violent, minor                                           | 1.3                   | (0.7–2.8)                   |
| Non-violent                                              | 0.8                   | (0.5–1.4)                   |
| None                                                     | 1.0                   | –                           |
|                                                          |                       | $\chi^2_3$ 1.19             |
| <b><u>Physical Healthcare and Injury Visits</u></b>      |                       |                             |
| Days with outpatient visit in past 2 months <sup>d</sup> | 1.0                   | (0.98–1.1)                  |
|                                                          |                       | $\chi^2_8$ 0.71             |
| Recency of injury visit (inpatient)                      |                       |                             |
| Never                                                    | 1.0                   | –                           |
| 1 month                                                  | 1.1                   | (0.3–3.4)                   |
| 2 months                                                 | –                     | –                           |
| 3+ months                                                | 1.2                   | (0.7–1.9)                   |
|                                                          |                       | $\chi^2_3$ 0.33             |
| Combat injury                                            |                       |                             |

|     |            |           |
|-----|------------|-----------|
| Yes | 1.0        | (0.5–2.1) |
| No  | 1.0        | –         |
|     | $\chi^2_1$ | 0.002     |

<sup>a</sup>Each variable was examined in a separate multivariate model that adjusted for socio-demographics (gender, current age, race, education, and marital status) and service-related characteristics (age at entry into Army service, time in service, deployment status, delayed promotion, demotion, military occupation).

<sup>b</sup>During month of attempt for cases (i.e., those with first-time documented suicide ideation who subsequently attempted suicide within the next 30 days of recorded ideation) versus during the month of first-time documented suicide ideation for controls (i.e., those who did not subsequently attempt suicide within the next 30 days)

<sup>c</sup>OR = Odds ratio; CI = Confidence interval

<sup>d</sup>Days with outpatient visits in past 2 months included the following categories: 0, 1, 2, 3, 4, 5, 6, 7, 8+

\* $p < .05$
